# Supplementary material for: Landscape attributes governing local transmission of an endemic zoonosis: Rabies virus in domestic dogs
Source: PubMed Central journal article supplement (PMC5900915; doi:10.1111/mec.14470), 2018-01-29

## Supplemental Information for:

### andscape attributes governing local transmission of an endemic zoonotic virus: rabies in domestic dogs.

Kirstyn Brunker, Philippe Lemey, Denise A. Marston, Anthony R. Fooks, Ahmed Lugelo, Chanasa Ngeleja, Katie Hampson, Roman Biek

#### Table of Contents:

|                   |         |
|-------------------|---------|
| <b>Methods S1</b> | Page 1  |
| <b>S1 Table</b>   | Page 6  |
| <b>S2 Table</b>   | Page 7  |
| <b>S3 Table</b>   | Page 9  |
| <b>S1 Fig</b>     | Page 30 |
| <b>S2 Fig</b>     | Page 31 |
| <b>S3 Fig</b>     | Page 32 |
| <b>S4 Fig</b>     | Page 33 |

#### METHODS S1

##### 454 pyrosequencing

Whole genome sequences for five samples (see Table S1) were generated via 454 pyrosequencing protocols. DNA for three samples was prepared according to the depletion method detailed in the main methods and sent to the Animal & Plant Health Agency (APHA) sequencing facility for the preparation of sequencing libraries and 454 pyrosequencing. The other two samples were prepared according to a PCR amplicon approach as follows. TRIzol-extracted viral RNA was reverse transcribed to cDNA using the primer RABV\_Tzdg.p1f (5' ACGCTTAACAACAAAATCAGAG 3') at a concentration of 2pmol/ $\mu$ l and Superscript III reverse transcriptase (Invitrogen) in a total volume of 20 $\mu$ l, as per manufacturer's instructions. An in house set of 26 short, tagged, overlapping primer pairs spanning the entire RABV genome was used to obtain PCR products with 1 $\mu$ l of cDNA and

KOD hot start DNA polymerase kit as per the manufacturer's protocol (Novagen). The following cycling parameters were used: 1 hold at 95 °C for 2 mins, 35 cycles at 95 °C for 20 s, 50-60°C (dependent on the optimized temperature for each primer pair) for 20 s, 70 °C for 20 s and a final hold at 70 °C for 10 min. Products were pooled for each sample with libraries and sequencing completed by the APHA sequencing facility.

## **Construction of resistance surfaces**

Landscape attributes were characterized as surface models by assigning cell values to represent the assumed facilitating or impeding impact of a predictor on RABV diffusion. Resistance surfaces for each attribute were formatted as follows:

### i) Dog density

Dog density estimates were taken from a household census conducted in the Serengeti District in 2014-2015, which provided the GPS location and dog count for each household. The density point pattern was smoothed across the default raster grid using an isotropic Gaussian smoothing kernel with  $\sigma=500$  using the R package *spatstat* (1) with cell values expressing the estimated intensity values. As dog density is assumed to facilitate RABV diffusion, the reciprocal of these values was used as a resistance value in each cell. Serengeti National Park (SNP) areas were assigned a low resistance value, equivalent to 1 dog per  $\text{km}^2$  to reflect the low dog density in this area. Cells outside the district (accounting for ~12% of all cells) were assigned random values from the Serengeti density data.

### ii) Dog presence

Dog census data as described above was used to assign a presence or absence value to 100m grid cells based on the exact locations of dogs. Dog presence was assigned a low resistance value of 0.1 to represent conductive "corridors" of movement through normal landscape, whereas absence was the null IBD value of 1 to represent higher resistance to dog movement outside connected corridors.

### iii) Elevation and slope

A digital elevation model covering the landscape was converted to raster format and elevation values used directly as resistance values. Slope values were calculated from the digital elevation model using the SDMTools package (2) in R. All slope values were increased by a value of 1 to ensure comparison to a null IBD surface was possible. The resolution of the digital elevation model was not consistent across the extent of the landscape as some areas have been mapped in more detail, which resulted in some finer grained areas in raster grids.

#### iv) Human to dog ratio (HDR)

Household census data was used to estimate the human to dog ratio per village, which was assigned directly as a resistance value in each cell.

#### v) Major roads and rivers

Shapefiles of major roads and rivers in the study area were converted to raster grids (one for roads, one for rivers) with the defined spatial extent and resolution. Cells containing a road feature were assigned a low resistance value of 0.001 to represent increased diffusion along roads relative to uniform landscape, all other cells were assigned a value of 1. River cells were assigned high resistance values of 1000 to reflect their influence as a barrier to diffusion.

#### vi) Average vaccination coverage

Mass dog vaccination campaigns have been undertaken in the Serengeti District since 2002, with varying annual coverage across villages. We used an average annual % vaccination coverage per village across the 11-year period from 2002 up to 2013 and assigned values to grid cells as resistance values [range: 6.43-100]. Rabies appears to have been locally eliminated in the SNP and there is a requirement for all dogs to be vaccinated within the park boundaries, therefore SNP cells were assigned the highest resistance value of 100. Cells outside the district and SNP were assigned the minimum observed average vaccination coverage of 6.43% as there is no formal vaccination initiative in these areas and therefore coverage is assumed to be low.

#### vi) Susceptible dog density

The dog density estimates were depleted according to the averaged vaccination coverage described above to produce a resistance surface representative of the susceptible host population density.

## vii) Number of vaccination campaigns

The number of vaccination campaigns conducted across the sampled time period 2004-2013 was summed for each village and assigned to each grid cell. Note some villages experienced return visits when turnout was less than expected, these were counted as separate campaigns if a coverage of at least 10% was achieved.

## **Determining an optimum location state partitioning scheme**

Rabies cases projected in MDS attribute-defined space were partitioned according to varying levels of spatial aggregation using a *k*-means algorithm. The following methods were used to obtain an optimum range of *k*-values to determine a partitioning scheme:

- i) Elbow method: the point of maximum curvature in a plot of number of clusters versus within-group sum of squares;
- ii) Partitioning around medoids: using the optimum average silhouette to estimate the number of clusters, R package: *fpc* (3)
- iii) Model-based clustering: chooses the optimal model and number of clusters according to Bayesian Information Criterion for expectation-maximisation, R package: *mclust* (4)
- iv) Affinity propagation: a clustering algorithm that takes a pairwise similarity matrix and simultaneously considers all data points as potential cluster centres. The algorithm finds an optimum set of clusters that maximises the total similarity between data points and their cluster centres by an iterative process (5), R package: *apcluster* (6);
- v) Gap statistic: a statistical procedure to formalise the "elbow" method by comparing the change in within-cluster dispersion to a reference null distribution (7), R package: *cluster* (8);
- vi) R package *NbClust*: provides 30 indices to determine the number of clusters (9).

1. Baddeley A, Turner R. *spatstat*: An R Package for Analyzing Spatial Point Patterns. *J Stat Softw* [Internet]. 2005;12(6):1–42. Available from: <http://citeseerx.ist.psu.edu/viewdoc/summary?doi=10.1.1.126.8464>
2. VanDerWal J, Falconi L, Januchowski, Stephanie Shoo L, Storlie C. *SDMTools*: Species Distribution Modelling

- Tools: Tools for processing data associated with species distribution modelling exercises. 2014.
3. Hennig C. fpc: Flexible procedures for clustering [Internet]. 2014. Available from: <http://cran.r-project.org/package=fpc>
  4. Fraley C, Raftery AE. Model-Based Clustering, Discriminant Analysis, and Density Estimation. *Journal of the American Statistical Association*. 2002. p. 611–31.
  5. Frey BJ, Dueck D. Clustering by Passing Messages Between Data Points. *Science* (80- ). 2007;315(5814):972–6.
  6. Bodenhofer U, Kothmeier A, Hochreiter S. Apcluster: An R package for affinity propagation clustering. *Bioinformatics*. 2011;27(17):2463–4.
  7. Tibshirani R, Walther G, Hastie T. Estimating the number of clusters in a data set via the gap statistic. *J R Stat Soc Ser B (Statistical Methodol [Internet]*. 2001;63:411–23. Available from: <http://onlinelibrary.wiley.com/doi/10.1111/1467-9868.00293/abstract>
  8. Maechler M, Rousseeuw P, Struyf A, Hubert M, Hornik K. Cluster Analysis Basics and Extensions. R package version 2.0.1 [Internet]. CRAN. 2015. Available from: <http://cran.r-project.org/web/packages/cluster/index.html>
  9. Charrad M, Ghazzali N, Boiteau V, Niknafs A. NbClust: An R Package for Determining the Relevant Number of Clusters in a Data Set. *J Stat Softw*. 2014;61(6):1–36.

**S1 Table. Model selection results of the continuous phylogeography diffusion model for Tanzania rabies virus dataset.** Shown are marginal likelihood estimates using path sampling and stepping stone sampling in BEAST, with the best model in bold.

| Diffusion model | Path Sampling    | Stepping Stone   |
|-----------------|------------------|------------------|
| Homogeneous     | -26674.93        | -26679.87        |
| <b>Gamma</b>    | <b>-26661.45</b> | <b>-26666.37</b> |
| Lognormal       | -26683.68        | -26688.12        |

# MOLECULAR ECOLOGY

**S2 Table. Pearson's correlation coefficients between paired resistance distance matrices for landscape attributes used to parameterize GLM diffusion models estimating the rabies virus movement in the Serengeti District.** Pairwise resistance distance matrices were constructed for  $k=5$  to 15 centroids. Correlations greater than 0.9 are highlighted in large bold text.

| Pairwise attribute combinations | k5          | k6          | k7          | k8          | k9          | k10         | k11         | k12         | k13         | k14         | k15         |
|---------------------------------|-------------|-------------|-------------|-------------|-------------|-------------|-------------|-------------|-------------|-------------|-------------|
| Campaigns,Dog density           | 0.55        | 0.85        | 0.58        | 0.45        | 0.56        | 0.51        | 0.70        | 0.54        | 0.35        | 0.30        | 0.39        |
| Campaigns,Dog presence          | 0.58        | 0.65        | 0.66        | 0.13        | 0.30        | 0.12        | 0.08        | 0.57        | 0.26        | 0.34        | 0.41        |
| Campaigns,Elevation             | 0.53        | 0.50        | 0.67        | 0.21        | 0.36        | -0.21       | -0.12       | 0.58        | -0.11       | 0.44        | 0.23        |
| Campaigns,HDR                   | 0.48        | 0.42        | -0.05       | 0.63        | 0.70        | -0.53       | -0.05       | 0.62        | -0.32       | 0.17        | 0.74        |
| Campaigns,Rivers                | -0.29       | 0.10        | 0.02        | -0.13       | 0.07        | -0.22       | -0.27       | 0.15        | 0.12        | 0.30        | 0.00        |
| Campaigns,Roads                 | 0.87        | 0.74        | 0.60        | 0.57        | 0.56        | 0.27        | 0.17        | 0.63        | 0.62        | 0.28        | 0.02        |
| Campaigns,Slope                 | -0.01       | 0.15        | -0.15       | -0.28       | -0.31       | -0.67       | -0.62       | -0.12       | -0.27       | -0.10       | -0.51       |
| Campaigns,Susceptibles          | 0.52        | 0.84        | 0.66        | 0.53        | 0.67        | 0.46        | 0.68        | 0.69        | 0.48        | 0.39        | 0.41        |
| Campaigns,VaccCov               | 0.57        | 0.70        | 0.88        | 0.72        | 0.77        | -0.51       | -0.07       | 0.72        | 0.73        | 0.85        | 0.47        |
| Dog density,Dog presence        | 0.86        | <b>0.91</b> | 0.73        | 0.82        | 0.75        | -0.17       | 0.06        | 0.68        | 0.66        | 0.63        | 0.09        |
| Dog density,Elevation           | 0.47        | 0.65        | 0.35        | 0.44        | 0.38        | 0.43        | 0.28        | 0.47        | -0.05       | 0.36        | 0.37        |
| Dog density,HDR                 | -0.01       | 0.14        | 0.10        | 0.03        | 0.17        | -0.32       | -0.03       | 0.01        | -0.08       | -0.04       | 0.28        |
| Dog density,Rivers              | 0.14        | 0.34        | -0.22       | 0.41        | 0.39        | -0.10       | -0.18       | 0.27        | 0.04        | 0.21        | -0.02       |
| Dog density,Roads               | 0.22        | 0.69        | 0.69        | 0.26        | 0.37        | 0.59        | -0.19       | 0.52        | 0.66        | 0.51        | 0.51        |
| Dog density,Slope               | 0.78        | 0.61        | 0.22        | 0.54        | 0.21        | -0.67       | -0.47       | 0.05        | 0.35        | 0.21        | -0.54       |
| Dog density,Susceptibles        | <b>0.97</b> | <b>0.99</b> | <b>0.98</b> | <b>0.98</b> | <b>0.98</b> | <b>0.96</b> | <b>0.98</b> | <b>0.96</b> | <b>0.96</b> | <b>0.97</b> | <b>0.98</b> |
| Dog density,VaccCov             | 0.30        | 0.55        | 0.23        | 0.31        | 0.36        | -0.22       | 0.28        | 0.20        | 0.09        | 0.40        | 0.38        |
| Dog presence,Elevation          | 0.85        | 0.86        | 0.77        | 0.80        | 0.83        | 0.11        | 0.15        | <b>0.90</b> | 0.00        | 0.86        | 0.14        |
| Dog presence,HDR                | 0.19        | 0.20        | -0.10       | 0.03        | 0.20        | 0.04        | 0.11        | 0.38        | -0.17       | 0.03        | 0.51        |
| Dog presence,Rivers             | 0.24        | 0.59        | -0.13       | 0.75        | 0.78        | 0.57        | 0.51        | 0.73        | 0.00        | 0.08        | 0.55        |
| Dog presence,Roads              | 0.34        | 0.66        | 0.84        | 0.26        | 0.44        | -0.06       | 0.26        | 0.57        | 0.54        | 0.63        | 0.19        |
| Dog presence,Slope              | 0.67        | 0.67        | 0.29        | 0.76        | 0.54        | 0.38        | 0.43        | 0.19        | 0.61        | 0.56        | 0.08        |
| Dog presence,Susceptibles       | 0.88        | <b>0.93</b> | 0.74        | 0.82        | 0.73        | -0.16       | 0.06        | 0.70        | 0.64        | 0.66        | 0.12        |

# MOLECULAR ECOLOGY

|                        |             |       |       |       |       |       |       |       |       |       |       |
|------------------------|-------------|-------|-------|-------|-------|-------|-------|-------|-------|-------|-------|
| Dog presence,VaccCov   | 0.45        | 0.53  | 0.51  | 0.06  | 0.11  | -0.16 | 0.12  | 0.36  | 0.22  | 0.33  | -0.12 |
| Elevation,HDR          | 0.42        | 0.55  | -0.18 | 0.39  | 0.49  | 0.32  | -0.11 | 0.60  | 0.65  | 0.09  | 0.20  |
| Elevation,Rivers       | 0.26        | 0.78  | 0.10  | 0.75  | 0.79  | 0.25  | 0.26  | 0.71  | 0.35  | 0.04  | 0.20  |
| Elevation,Roads        | 0.52        | 0.52  | 0.46  | 0.49  | 0.57  | 0.41  | -0.06 | 0.54  | 0.03  | 0.49  | 0.45  |
| Elevation,Slope        | 0.28        | 0.41  | 0.15  | 0.47  | 0.33  | 0.10  | 0.30  | 0.14  | 0.02  | 0.36  | -0.04 |
| Elevation,Susceptibles | 0.51        | 0.69  | 0.42  | 0.52  | 0.43  | 0.46  | 0.33  | 0.55  | -0.08 | 0.41  | 0.43  |
| Elevation,VaccCov      | 0.49        | 0.55  | 0.74  | 0.09  | 0.17  | 0.37  | 0.31  | 0.48  | -0.15 | 0.39  | 0.52  |
| HDR,Rivers             | 0.42        | 0.32  | -0.03 | 0.10  | 0.31  | 0.42  | 0.24  | 0.36  | 0.14  | 0.05  | 0.24  |
| HDR,Roads              | 0.51        | 0.21  | 0.05  | 0.21  | 0.23  | -0.03 | -0.21 | 0.28  | -0.11 | -0.13 | -0.09 |
| HDR,Slope              | -0.49       | -0.42 | 0.08  | -0.37 | -0.48 | 0.35  | 0.06  | -0.33 | -0.10 | 0.05  | -0.05 |
| HDR,Susceptibles       | 0.14        | 0.21  | 0.10  | 0.15  | 0.32  | -0.16 | -0.02 | 0.21  | -0.12 | -0.07 | 0.27  |
| HDR,VaccCov            | <b>0.91</b> | 0.75  | -0.13 | 0.73  | 0.79  | 0.90  | 0.15  | 0.80  | -0.30 | 0.10  | 0.24  |
| Rivers,Roads           | -0.29       | 0.06  | -0.40 | 0.09  | 0.22  | -0.07 | 0.23  | 0.33  | -0.08 | 0.16  | 0.26  |
| Rivers,Slope           | 0.16        | 0.51  | 0.35  | 0.52  | 0.35  | 0.51  | 0.60  | 0.25  | -0.04 | -0.09 | 0.50  |
| Rivers,Susceptibles    | 0.28        | 0.34  | -0.28 | 0.42  | 0.39  | -0.01 | -0.14 | 0.28  | -0.06 | 0.33  | 0.04  |
| Rivers,VaccCov         | 0.43        | 0.10  | -0.06 | -0.13 | 0.02  | 0.24  | -0.03 | 0.13  | 0.23  | 0.44  | 0.01  |
| Roads,Slope            | -0.32       | 0.06  | 0.04  | -0.13 | 0.00  | -0.57 | -0.09 | -0.07 | -0.03 | 0.03  | -0.19 |
| Roads,Susceptibles     | 0.14        | 0.70  | 0.75  | 0.33  | 0.45  | 0.63  | -0.11 | 0.63  | 0.72  | 0.60  | 0.58  |
| Roads,VaccCov          | 0.40        | 0.54  | 0.43  | 0.02  | 0.06  | 0.10  | -0.23 | 0.19  | 0.36  | 0.06  | 0.15  |
| Slope,Susceptibles     | 0.75        | 0.57  | 0.08  | 0.51  | 0.11  | -0.67 | -0.51 | -0.09 | 0.22  | 0.15  | -0.53 |
| Slope,VaccCov          | -0.16       | -0.16 | -0.40 | -0.13 | -0.36 | 0.29  | -0.25 | -0.34 | -0.41 | -0.11 | -0.24 |
| Susceptibles,VaccCov   | 0.48        | 0.64  | 0.36  | 0.35  | 0.44  | -0.08 | 0.32  | 0.37  | 0.24  | 0.49  | 0.45  |



# MOLECULAR ECOLOGY

**S3 Table. Epidemiological information and whole genome sequencing (WGS) details for 152 rabies virus samples collected from the Serengeti District, Tanzania, between 2004 and 2013.**

| Sample ID | Date of sample collection | Easting | Northing | Host         | WGS protocol | Total quality trimmed reads | Viral reads mapped | Proportion viral reads | Average depth | GenBank Accession | Details/Reference                                                                       |
|-----------|---------------------------|---------|----------|--------------|--------------|-----------------------------|--------------------|------------------------|---------------|-------------------|-----------------------------------------------------------------------------------------|
| RV2483    | 28/09/08                  | 701590  | 9794710  | Goat         | MiSeq        | 397221                      | 2045               | 0.51                   | 22.05         | KY210220          | This paper                                                                              |
| RV2485    | 28/09/08                  | 701590  | 9794710  | Goat         | MiSeq        | 300966                      | 907                | 0.30                   | 8.12          | KY210221          | This paper                                                                              |
| RV2489    | 17/01/09                  | 699900  | 9794413  | Domestic dog | MiSeq        | 2665913                     | 3359               | 0.13                   | 16.43         | KY210222          | This paper                                                                              |
| RV2490    | 07/08/08                  | 702122  | 9796402  | Domestic dog | MiSeq        | 1013605                     | 8526               | 0.84                   | 79.09         | KR534217          | Original GenBank submission (Brunker <i>et al</i> , 2015) updated to WGS for this paper |
| RV2491    | 02/08/08                  | 696748  | 9794246  | Domestic dog | MiSeq        | 1421454                     | 10733              | 0.76                   | 101.98        | KR534218          | Original GenBank submission (Brunker                                                    |

# MOLECULAR ECOLOGY

|            |          |            |             |                     |       |         |       |      |        |              |                                                                                                                       |
|------------|----------|------------|-------------|---------------------|-------|---------|-------|------|--------|--------------|-----------------------------------------------------------------------------------------------------------------------|
|            |          |            |             |                     |       |         |       |      |        |              | <i>et al</i> ,2015) updated to WGS for this paper                                                                     |
| RV24<br>92 | 03/11/07 | 685<br>837 | 9799<br>418 | Dom<br>estic<br>dog | MiSeq | 1642925 | 12895 | 0.78 | 100.93 | KR53<br>4219 | Original<br>GenBank<br>submissio<br>n<br>(Brunker<br><i>et al</i><br>,2015)<br>updated<br>to WGS<br>for this<br>paper |
| RV24<br>93 | 31/07/08 | 700<br>689 | 9793<br>979 | Dom<br>estic<br>dog | MiSeq | 1304543 | 4780  | 0.37 | 44.57  | KR53<br>4220 | Original<br>GenBank<br>submissio<br>n<br>(Brunker<br><i>et al</i><br>,2015)<br>updated<br>to WGS<br>for this<br>paper |
| RV24<br>95 | 12/07/08 | 696<br>385 | 9802<br>796 | Dom<br>estic<br>dog | MiSeq | 1946750 | 14768 | 0.76 | 129.48 | KR90<br>6734 | Brunker<br><i>et al</i><br>,2015                                                                                      |

# MOLECULAR ECOLOGY

|            |          |            |             |                     |               |          |       |      |        |              |                                                                                                                       |
|------------|----------|------------|-------------|---------------------|---------------|----------|-------|------|--------|--------------|-----------------------------------------------------------------------------------------------------------------------|
| RV24<br>97 | 22/06/07 | 678<br>577 | 9807<br>715 | Dom<br>estic<br>dog | MiSeq/NextSeq | 15591341 | 6031  | 0.04 | 63.98  | KY21<br>0223 | This paper                                                                                                            |
| RV25<br>00 | 23/11/08 | 698<br>019 | 9804<br>712 | Dom<br>estic<br>dog | MiSeq         | 557886   | 1536  | 0.28 | 15.86  | KR90<br>6737 | Brunker<br><i>et al</i><br>,2015                                                                                      |
| RV25<br>01 | 14/02/04 | 679<br>372 | 9810<br>508 | Dom<br>estic<br>dog | MiSeq         | 1030023  | 11539 | 1.12 | 108.23 | KR90<br>6738 | Brunker<br><i>et al</i><br>,2015                                                                                      |
| RV25<br>03 | 15/02/09 | 686<br>729 | 9761<br>151 | Wild<br>cat         | MiSeq         | 1325075  | 2774  | 0.21 | 28.64  | KR90<br>6740 | Brunker<br><i>et al</i><br>,2015                                                                                      |
| RV27<br>67 | 12/09/09 | 665<br>178 | 9777<br>064 | Dom<br>estic<br>dog | MiSeq         | 1039525  | 23560 | 2.27 | 249.79 | KR90<br>6742 | Brunker<br><i>et al</i><br>,2015                                                                                      |
| RV27<br>86 | 20/06/10 | 670<br>876 | 9811<br>501 | Dom<br>estic<br>dog | MiSeq/NextSeq | 15706254 | 10705 | 0.07 | 109.00 | KY21<br>0224 | This paper                                                                                                            |
| RV27<br>88 | 05/08/10 | 668<br>396 | 9794<br>012 | Dom<br>estic<br>dog | MiSeq         | 1952400  | 16416 | 0.84 | 181.53 | KR53<br>4228 | Original<br>GenBank<br>submissio<br>n<br>(Brunker<br><i>et al</i><br>,2015)<br>updated<br>to WGS<br>for this<br>paper |
| RV27<br>89 | 22/10/10 | 686<br>741 | 9795<br>339 | Dom<br>estic        | MiSeq         | 825552   | 1753  | 0.21 | 16.94  | KR53<br>4229 | Original<br>GenBank                                                                                                   |

# MOLECULAR ECOLOGY

|            |          |            |             |                     |               |          |       |      |        |              |                                                                                                                       |
|------------|----------|------------|-------------|---------------------|---------------|----------|-------|------|--------|--------------|-----------------------------------------------------------------------------------------------------------------------|
|            |          |            |             | dog                 |               |          |       |      |        |              | submissio<br>n<br>(Brunker<br><i>et al</i><br>,2015)<br>updated<br>to WGS<br>for this<br>paper                        |
| RV27<br>90 | 01/11/10 | 678<br>362 | 9807<br>838 | Dom<br>estic<br>dog | MiSeq         | 190118   | 2054  | 1.08 | 20.87  | KR53<br>4230 | Original<br>GenBank<br>submissio<br>n<br>(Brunker<br><i>et al</i><br>,2015)<br>updated<br>to WGS<br>for this<br>paper |
| RV27<br>91 | 08/11/10 | 681<br>329 | 9802<br>616 | Dom<br>estic<br>dog | MiSeq/NextSeq | 15068608 | 20740 | 0.14 | 237.54 | KR53<br>4231 | Original<br>GenBank<br>submissio<br>n<br>(Brunker<br><i>et al</i><br>,2015)<br>updated<br>to WGS<br>for this<br>paper |

# MOLECULAR ECOLOGY

|            |          |            |             |                 |               |          |       |      |        |              |                                                                                                                       |
|------------|----------|------------|-------------|-----------------|---------------|----------|-------|------|--------|--------------|-----------------------------------------------------------------------------------------------------------------------|
| RV27<br>92 | 07/01/11 | 670<br>624 | 9824<br>613 | Jackal          | MiSeq/NextSeq | 13995380 | 19366 | 0.14 | 215.26 | KR53<br>4232 | Original<br>GenBank<br>submissio<br>n<br>(Brunker<br><i>et al</i><br>,2015)<br>updated<br>to WGS<br>for this<br>paper |
| RV27<br>93 | 02/01/11 | 657<br>176 | 9822<br>908 | Cow             | MiSeq         | 149085   | 3900  | 2.62 | 38.81  | KR90<br>6755 | Brunker<br><i>et al</i><br>,2015                                                                                      |
| RV27<br>94 | 12/01/11 | 679<br>391 | 9807<br>221 | Domestic<br>dog | MiSeq         | 514797   | 2064  | 0.40 | 19.28  | KR53<br>4233 | Original<br>GenBank<br>submissio<br>n<br>(Brunker<br><i>et al</i><br>,2015)<br>updated<br>to WGS<br>for this<br>paper |
| RV27<br>95 | 16/01/11 | 682<br>879 | 9801<br>080 | Cow             | MiSeq         | 369231   | 12824 | 3.47 | 134.33 | KR53<br>4234 | Original<br>GenBank<br>submissio<br>n<br>(Brunker<br><i>et al</i>                                                     |

# MOLECULAR ECOLOGY

|            |          |            |             |     |       |         |       |      |        |              |                                                                                                                       |
|------------|----------|------------|-------------|-----|-------|---------|-------|------|--------|--------------|-----------------------------------------------------------------------------------------------------------------------|
|            |          |            |             |     |       |         |       |      |        |              | ,2015)<br>updated<br>to WGS<br>for this<br>paper                                                                      |
| RV27<br>96 | 19/01/11 | 671<br>651 | 9801<br>501 | Cow | MiSeq | 1033943 | 56028 | 5.42 | 508.13 | KR53<br>4235 | Original<br>GenBank<br>submissio<br>n<br>(Brunker<br><i>et al</i><br>,2015)<br>updated<br>to WGS<br>for this<br>paper |
| RV27<br>97 | 30/01/11 | 663<br>782 | 9800<br>181 | Cow | MiSeq | 1278027 | 25740 | 2.01 | 229.21 | KR53<br>4236 | Original<br>GenBank<br>submissio<br>n<br>(Brunker<br><i>et al</i><br>,2015)<br>updated<br>to WGS<br>for this<br>paper |
| RV27<br>98 | 31/01/11 | 663<br>782 | 9800<br>181 | Cow | MiSeq | 1287235 | 69613 | 5.41 | 604.45 | KR53<br>4237 | Original<br>GenBank<br>submissio<br>n                                                                                 |

# MOLECULAR ECOLOGY

|        |          |        |         |              |       |         |        |       |         |          |                                                                                         |
|--------|----------|--------|---------|--------------|-------|---------|--------|-------|---------|----------|-----------------------------------------------------------------------------------------|
|        |          |        |         |              |       |         |        |       |         |          | (Brunker <i>et al</i> , 2015) updated to WGS for this paper                             |
| RV2799 | 29/01/11 | 680129 | 9805797 | Domestic dog | MiSeq | 1347238 | 4352   | 0.32  | 41.33   | KR906756 | Brunker <i>et al</i> , 2015                                                             |
| RV2800 | 17/02/11 | 666237 | 9778079 | Domestic dog | MiSeq | 142582  | 2917   | 2.05  | 33.48   | KR534238 | Original GenBank submission (Brunker <i>et al</i> , 2015) updated to WGS for this paper |
| RV2858 | 21/02/11 | 646139 | 9824316 | Goat         | MiSeq | 1503125 | 120336 | 8.01  | 935.41  | KY210225 | This paper                                                                              |
| RV2859 | 01/03/11 | 650148 | 9819597 | Domestic dog | MiSeq | 283796  | 8437   | 2.97  | 88.54   | KY210226 | This paper                                                                              |
| RV2861 | 11/05/11 | 691423 | 9791388 | Domestic dog | MiSeq | 1359627 | 164027 | 12.06 | 1259.37 | KR906767 | Brunker <i>et al</i> , 2015                                                             |
| RV2862 | 11/05/11 | 674259 | 9805687 | Domestic     | MiSeq | 1177250 | 2121   | 0.18  | 21.18   | KR906768 | Brunker <i>et al</i>                                                                    |

# MOLECULAR ECOLOGY

|            |          |            |             |                     |                                     |          |        |       |         |              |                                  |
|------------|----------|------------|-------------|---------------------|-------------------------------------|----------|--------|-------|---------|--------------|----------------------------------|
|            |          |            |             | dog                 |                                     |          |        |       |         |              | ,2015                            |
| RV28<br>63 | 19/04/11 | 672<br>066 | 9805<br>512 | Dom<br>estic<br>dog | MiSeq                               | 448320   | 24262  | 5.41  | 194.02  | KY21<br>0227 | This paper                       |
| RV28<br>66 | 15/04/11 | 678<br>461 | 9808<br>213 | Goat                | MiSeq/NextSeq                       | 17707815 | 1007   | 0.01  | 9.98    | KY21<br>0228 | This paper                       |
| RV28<br>67 | 22/05/11 | 677<br>206 | 9802<br>038 | Dom<br>estic<br>dog | 454<br>pyrosequencing:<br>depletion | 2965005  | 2967   | 0.10  | 18.65   | KY21<br>0229 | This paper                       |
| RV28<br>68 | 06/06/11 | 678<br>588 | 9807<br>873 | Cow                 | MiSeq                               | 703095   | 27276  | 3.88  | 272.91  | KY21<br>0230 | This paper                       |
| RV28<br>70 | 01/06/11 | 697<br>216 | 9792<br>726 | Dom<br>estic<br>dog | MiSeq                               | 529286   | 19381  | 3.66  | 154.52  | KY21<br>0231 | This paper                       |
| RV28<br>71 | 17/06/11 | 701<br>315 | 9794<br>641 | Dom<br>estic<br>dog | 454<br>pyrosequencing:<br>amplicon  | 46796    | 8850   | 18.91 | 25.34   | KR90<br>6769 | Brunker<br><i>et al</i><br>,2015 |
| RV28<br>73 | 20/06/11 | 687<br>042 | 9796<br>792 | Dom<br>estic<br>dog | MiSeq                               | 2235772  | 35378  | 1.58  | 359.16  | KY21<br>0232 | This paper                       |
| RV28<br>75 | 29/06/11 | 680<br>196 | 9811<br>835 | Dom<br>estic<br>dog | MiSeq                               | 407187   | 9927   | 2.44  | 99.27   | KR90<br>6770 |                                  |
| RV28<br>77 | 30/06/11 | 679<br>837 | 9808<br>655 | Goat                | MiSeq                               | 4169008  | 168447 | 4.04  | 1494.91 | KY21<br>0233 | This paper                       |
| RV28<br>78 | 03/07/11 | 689<br>579 | 9796<br>947 | Dom<br>estic<br>dog | MiSeq                               | 146105   | 1933   | 1.32  | 21.85   | KY21<br>0234 | This paper                       |
| RV28<br>79 | 10/06/11 | 698<br>379 | 9806<br>085 | Dom<br>estic<br>dog | MiSeq                               | 696671   | 6806   | 0.98  | 68.17   | KY21<br>0235 | This paper                       |



# MOLECULAR ECOLOGY

|            |          |            |             |                     |                                     |          |       |       |        |              |                                                                                        |
|------------|----------|------------|-------------|---------------------|-------------------------------------|----------|-------|-------|--------|--------------|----------------------------------------------------------------------------------------|
| RV28<br>80 | 02/07/11 | 678<br>588 | 9807<br>873 | Cow                 | MiSeq                               | 795216   | 8731  | 1.10  | 92.11  | KY21<br>0236 | This paper                                                                             |
| RV28<br>81 | 07/07/11 | 698<br>357 | 9806<br>963 | Cow                 | MiSeq                               | 1101481  | 12573 | 1.14  | 117.68 | KY21<br>0237 | This paper                                                                             |
| RV28<br>82 | 23/07/11 | 676<br>741 | 9807<br>751 | Dom<br>estic<br>dog | 454<br>pyrosequencing:<br>depletion | 2896363  | 35151 | 1.21  | 88.58  | KY21<br>0238 | This paper                                                                             |
| RV28<br>83 | 23/07/11 | 686<br>525 | 9797<br>308 | Dom<br>estic<br>dog | MiSeq/NextSeq                       | 20693938 | 21557 | 0.10  | 221.41 | KY21<br>0239 | This paper                                                                             |
| RV28<br>84 | 21/07/11 | 675<br>366 | 9806<br>739 | Cow                 | MiSeq                               | 1107607  | 9926  | 0.90  | 102.65 | KY21<br>0240 | This paper                                                                             |
| RV28<br>85 | 24/07/11 | 694<br>855 | 9798<br>730 | Goat                | MiSeq                               | 969814   | 3303  | 0.34  | 33.06  | KY21<br>0241 | This paper                                                                             |
| RV28<br>86 | 21/07/11 | 701<br>234 | 9794<br>942 | Goat                | 454<br>pyrosequencing:<br>amplicon  | 48056    | 16226 | 33.76 | 64.02  | KY21<br>0242 | This paper                                                                             |
| RV28<br>87 | 25/07/11 | 695<br>864 | 9798<br>032 | Dom<br>estic<br>dog | MiSeq                               | 1044324  | 2444  | 0.23  | 24.46  | KY21<br>0243 | This paper                                                                             |
| RV28<br>88 | 29/07/11 | 700<br>262 | 9793<br>490 | Dom<br>estic<br>dog | MiSeq                               | 1517717  | 19413 | 1.28  | 189.29 | KY21<br>0244 | This paper                                                                             |
| RV28<br>89 | 03/08/11 | 693<br>407 | 9791<br>698 | Dom<br>estic<br>dog | MiSeq                               | 1395952  | 5503  | 0.39  | 50.33  | KR53<br>4244 | Original<br>GenBank<br>submissio<br>n<br>(Brunker<br><i>et al</i><br>,2015)<br>updated |

# MOLECULAR ECOLOGY

|            |          |            |             |                     |                                     |         |       |      |        |              |                                                                                                                       |
|------------|----------|------------|-------------|---------------------|-------------------------------------|---------|-------|------|--------|--------------|-----------------------------------------------------------------------------------------------------------------------|
|            |          |            |             |                     |                                     |         |       |      |        |              | to WGS<br>for this<br>paper                                                                                           |
| RV28<br>90 | 03/08/11 | 651<br>666 | 9819<br>798 | Cow                 | MiSeq                               | 1725539 | 16406 | 0.95 | 155.06 | KR53<br>4245 | Original<br>GenBank<br>submissio<br>n<br>(Brunker<br><i>et al</i><br>,2015)<br>updated<br>to WGS<br>for this<br>paper |
| RV28<br>91 | 10/08/11 | 680<br>536 | 9813<br>026 | Civet               | MiSeq                               | 1290933 | 54121 | 4.19 | 414.53 | KR53<br>4246 | Original<br>GenBank<br>submissio<br>n<br>(Brunker<br><i>et al</i><br>,2015)<br>updated<br>to WGS<br>for this<br>paper |
| RV28<br>92 | 12/08/11 | 676<br>741 | 9807<br>751 | Dom<br>estic<br>dog | 454<br>pyrosequencing:<br>depletion | 2796394 | 50188 | 1.79 | 91.09  | KR53<br>4247 | Original<br>GenBank<br>submissio<br>n<br>(Brunker<br><i>et al</i>                                                     |

# MOLECULAR ECOLOGY

|            |          |            |             |                     |       |         |        |      |         |              |                                                                                                                       |
|------------|----------|------------|-------------|---------------------|-------|---------|--------|------|---------|--------------|-----------------------------------------------------------------------------------------------------------------------|
|            |          |            |             |                     |       |         |        |      |         |              | ,2015)<br>updated<br>to WGS<br>for this<br>paper                                                                      |
| RV28<br>93 | 01/08/11 | 651<br>666 | 9819<br>798 | Cow                 | MiSeq | 1637158 | 31071  | 1.90 | 278.08  | KR53<br>4248 | Original<br>GenBank<br>submissio<br>n<br>(Brunker<br><i>et al</i><br>,2015)<br>updated<br>to WGS<br>for this<br>paper |
| RV28<br>94 | 15/08/11 | 653<br>024 | 9822<br>353 | Dom<br>estic<br>dog | MiSeq | 2125096 | 188049 | 8.85 | 1469.55 | KR90<br>6771 | Brunker<br><i>et al</i><br>,2015                                                                                      |
| RV28<br>95 | 18/08/11 | 678<br>334 | 9797<br>356 | Dom<br>estic<br>dog | MiSeq | 2273420 | 19720  | 0.87 | 210.02  | KR53<br>4249 | Original<br>GenBank<br>submissio<br>n<br>(Brunker<br><i>et al</i><br>,2015)<br>updated<br>to WGS<br>for this<br>paper |
| RV28       | 19/08/11 | 681        | 9798        | Dom                 | MiSeq | 1104977 | 7214   | 0.65 | 68.67   | KR90         | Brunker                                                                                                               |

# MOLECULAR ECOLOGY

|            |          |            |             |                     |               |          |       |      |        |              |                                                                                                                       |
|------------|----------|------------|-------------|---------------------|---------------|----------|-------|------|--------|--------------|-----------------------------------------------------------------------------------------------------------------------|
| 96         |          | 869        | 035         | estic<br>dog        |               |          |       |      |        | 6772         | <i>et al</i><br>,2015                                                                                                 |
| RV28<br>97 | 02/09/11 | 678<br>907 | 9808<br>303 | Dom<br>estic<br>dog | MiSeq         | 984501   | 9581  | 0.97 | 92.68  | KR53<br>4250 | Original<br>GenBank<br>submissio<br>n<br>(Brunker<br><i>et al</i><br>,2015)<br>updated<br>to WGS<br>for this<br>paper |
| RV28<br>98 | 18/09/11 | 658<br>269 | 9804<br>143 | Dom<br>estic<br>dog | MiSeq/NextSeq | 19197193 | 20664 | 0.11 | 206.05 | KR53<br>4251 | Original<br>GenBank<br>submissio<br>n<br>(Brunker<br><i>et al</i><br>,2015)<br>updated<br>to WGS<br>for this<br>paper |
| RV28<br>99 | 23/09/11 | 658<br>245 | 9804<br>462 | Dom<br>estic<br>dog | MiSeq         | 897751   | 8818  | 0.98 | 85.53  | KR53<br>4252 | Original<br>GenBank<br>submissio<br>n<br>(Brunker<br><i>et al</i><br>,2015)                                           |

# MOLECULAR ECOLOGY

|        |          |        |         |              |       |         |       |      |        |          |                                                                                         |
|--------|----------|--------|---------|--------------|-------|---------|-------|------|--------|----------|-----------------------------------------------------------------------------------------|
|        |          |        |         |              |       |         |       |      |        |          | updated to WGS for this paper                                                           |
| RV2900 | 27/09/11 | 656396 | 9803751 | Domestic dog | MiSeq | 1326869 | 8924  | 0.67 | 84.32  | KR906773 | Brunker <i>et al</i> , 2015                                                             |
| RV2901 | 22/09/11 | 653179 | 9802910 | Domestic dog | MiSeq | 522728  | 10710 | 2.05 | 106.87 | KR906774 | Brunker <i>et al</i> , 2015                                                             |
| RV2902 | 24/09/11 | 684532 | 9790009 | Domestic dog | MiSeq | 1204863 | 5234  | 0.43 | 43.68  | KR906775 | Brunker <i>et al</i> , 2015                                                             |
| RV2903 | 05/10/11 | 657232 | 9804521 | Domestic dog | MiSeq | 1219764 | 6605  | 0.54 | 62.45  | KR534253 | Original GenBank submission (Brunker <i>et al</i> , 2015) updated to WGS for this paper |
| RV2906 | 08/09/11 | 681338 | 9808012 | Cat          | MiSeq | 1283722 | 19254 | 1.50 | 170.85 | KR534254 | Original GenBank submission (Brunker <i>et al</i> , 2015)                               |

# MOLECULAR ECOLOGY

|        |          |        |         |              |         |          |        |      |         |          |                               |
|--------|----------|--------|---------|--------------|---------|----------|--------|------|---------|----------|-------------------------------|
|        |          |        |         |              |         |          |        |      |         |          | updated to WGS for this paper |
| RV2907 | 16/10/11 | 700560 | 9803728 | Cow          | MiSeq   | 1353429  | 7867   | 0.58 | 71.47   | KR906776 | Brunker <i>et al</i> , 2015   |
| RV2909 | 12/11/11 | 663440 | 9804477 | Cow          | MiSeq   | 893349   | 20317  | 2.27 | 194.08  | KR534256 | Brunker <i>et al</i> , 2015   |
| RV3047 | 10/08/12 | 655560 | 9809040 | Domestic dog | NextSeq | 14822146 | 193963 | 1.31 | 1634.14 | KY210245 | This paper                    |
| RV3048 | 17/09/12 | 690718 | 9803251 | Sheep        | NextSeq | 13774437 | 92882  | 0.67 | 865.92  | KY210246 | This paper                    |
| RV3049 | 04/10/12 | 689087 | 9797146 | Domestic dog | NextSeq | 14925758 | 68578  | 0.46 | 634.13  | KY210247 | This paper                    |
| RV3050 | 02/09/12 | 671593 | 9804068 | Domestic dog | NextSeq | 12716032 | 689856 | 5.43 | 5022.73 | KY210248 | This paper                    |
| RV3051 | 12/10/12 | 684769 | 9779316 | Domestic dog | NextSeq | 13274035 | 33398  | 0.25 | 308.65  | KY210249 | This paper                    |
| RV3052 | 13/11/12 | 643810 | 9813739 | Domestic dog | NextSeq | 10917330 | 110185 | 1.01 | 1077.20 | KY210250 | This paper                    |
| RV3053 | 10/11/12 | 646262 | 9815621 | Domestic dog | NextSeq | 11787802 | 61379  | 0.52 | 600.13  | KY210251 | This paper                    |
| RV30   | 08/12/12 | 655    | 9810    | Dom          | NextSeq | 13502719 | 629341 | 4.66 | 4329.86 | KY21     | This paper                    |

# MOLECULAR ECOLOGY

|            |          |            |             |                     |         |          |         |       |         |              |            |
|------------|----------|------------|-------------|---------------------|---------|----------|---------|-------|---------|--------------|------------|
| 57         |          | 999        | 468         | estic<br>dog        |         |          |         |       |         | 0252         |            |
| RV30<br>58 | 18/01/13 | 648<br>713 | 9819<br>325 | Dom<br>estic<br>dog | NextSeq | 11873546 | 143723  | 1.21  | 1031.42 | KY21<br>0253 | This paper |
| RV30<br>59 | 11/01/13 | 654<br>132 | 9825<br>734 | Dom<br>estic<br>dog | NextSeq | 12420277 | 786476  | 6.33  | 4587.68 | KY21<br>0254 | This paper |
| RV30<br>60 | 04/01/13 | 654<br>509 | 9823<br>226 | Dom<br>estic<br>dog | NextSeq | 12150398 | 316716  | 2.61  | 2450.02 | KY21<br>0255 | This paper |
| RV30<br>61 | 08/01/13 | 651<br>604 | 9821<br>249 | Dom<br>estic<br>dog | NextSeq | 12380235 | 386682  | 3.12  | 2883.85 | KY21<br>0256 | This paper |
| RV30<br>63 | 08/01/13 | 691<br>639 | 9810<br>370 | Dom<br>estic<br>dog | NextSeq | 11500684 | 37364   | 0.32  | 365.20  | KY21<br>0257 | This paper |
| RV30<br>64 | 02/01/13 | 687<br>567 | 9796<br>857 | Dom<br>estic<br>dog | NextSeq | 11829231 | 48612   | 0.41  | 469.26  | KY21<br>0258 | This paper |
| RV30<br>66 | 23/02/13 | 652<br>145 | 9807<br>506 | Cat                 | NextSeq | 10441152 | 159856  | 1.53  | 1487.65 | KY21<br>0259 | This paper |
| RV30<br>67 | 25/02/13 | 653<br>061 | 9777<br>091 | Dom<br>estic<br>dog | NextSeq | 15872978 | 3697    | 0.02  | 35.46   | KY21<br>0260 | This paper |
| RV30<br>68 | 11/04/13 | 696<br>403 | 9791<br>890 | Goat                | NextSeq | 11386195 | 304247  | 2.67  | 2459.48 | KY21<br>0261 | This paper |
| RV30<br>70 | 27/02/13 | 673<br>866 | 9807<br>701 | Goat                | NextSeq | 10573869 | 50029   | 0.47  | 504.04  | KY21<br>0262 | This paper |
| RV30<br>71 | 13/04/13 | 680<br>151 | 9814<br>868 | Dom<br>estic        | NextSeq | 13361066 | 1493699 | 11.18 | 7981.02 | KY21<br>0263 | This paper |

# MOLECULAR ECOLOGY

|            |          |            |             |                     |         |          |         |      |         |              |            |
|------------|----------|------------|-------------|---------------------|---------|----------|---------|------|---------|--------------|------------|
|            |          |            |             | dog                 |         |          |         |      |         |              |            |
| RV30<br>72 | 10/04/13 | 672<br>356 | 9817<br>934 | Dom<br>estic<br>dog | NextSeq | 10909432 | 1088443 | 9.98 | 6940.73 | KY21<br>0264 | This paper |
| RV30<br>73 | 18/02/13 | 697<br>846 | 9808<br>299 | Dom<br>estic<br>dog | NextSeq | 9431525  | 84544   | 0.90 | 816.23  | KY21<br>0265 | This paper |
| RV30<br>74 | 01/02/13 | 658<br>498 | 9825<br>235 | Dom<br>estic<br>dog | NextSeq | 13487972 | 780515  | 5.79 | 5369.35 | KY21<br>0266 | This paper |
| RV30<br>75 | 31/01/13 | 658<br>498 | 9825<br>235 | Dom<br>estic<br>dog | NextSeq | 12309563 | 85376   | 0.69 | 834.07  | KY21<br>0267 | This paper |
| RV30<br>78 | 26/05/13 | 684<br>594 | 9779<br>133 | Cow                 | NextSeq | 13267270 | 324339  | 2.44 | 2550.76 | KY21<br>0268 | This paper |
| RV30<br>79 | 18/07/13 | 700<br>214 | 9793<br>780 | Dom<br>estic<br>dog | NextSeq | 13140710 | 10369   | 0.08 | 103.78  | KY21<br>0269 | This paper |
| RV30<br>80 | 17/07/13 | 700<br>300 | 9793<br>350 | Dom<br>estic<br>dog | NextSeq | 12398079 | 71735   | 0.58 | 581.75  | KY21<br>0270 | This paper |
| RV30<br>82 | 03/09/13 | 670<br>878 | 9795<br>201 | Dom<br>estic<br>dog | NextSeq | 13023573 | 46367   | 0.36 | 485.26  | KY21<br>0271 | This paper |
| RV30<br>84 | 22/08/13 | 697<br>865 | 9803<br>607 | Dom<br>estic<br>dog | NextSeq | 9206525  | 18253   | 0.20 | 179.18  | KY21<br>0272 | This paper |
| RV30<br>85 | 06/09/13 | 683<br>848 | 9810<br>611 | Dom<br>estic<br>dog | NextSeq | 11789633 | 64210   | 0.54 | 590.80  | KY21<br>0273 | This paper |



# MOLECULAR ECOLOGY

|            |          |            |             |                     |               |          |        |      |         |              |                                  |
|------------|----------|------------|-------------|---------------------|---------------|----------|--------|------|---------|--------------|----------------------------------|
| RV30<br>86 | 06/09/13 | 697<br>902 | 9792<br>902 | Cow                 | NextSeq       | 13831121 | 298860 | 2.16 | 2439.13 | KY21<br>0274 | This paper                       |
| RV30<br>87 | 06/09/13 | 699<br>819 | 9795<br>099 | Cow                 | NextSeq       | 17902151 | 12527  | 0.07 | 126.18  | KY21<br>0275 | This paper                       |
| RV30<br>88 | 25/04/13 | 691<br>229 | 9812<br>934 | Cow                 | NextSeq       | 18221434 | 358845 | 1.97 | 2936.54 | KY21<br>0276 | This paper                       |
| RV30<br>90 | 25/11/11 | 696<br>825 | 9790<br>124 | Cow                 | MiSeq         | 129980   | 10825  | 8.33 | 104.41  | KY21<br>0277 | This paper                       |
| RV30<br>91 | 05/12/11 | 696<br>698 | 9792<br>023 | Dom<br>estic<br>dog | MiSeq/NextSeq | 18376860 | 50860  | 0.28 | 496.86  | KR90<br>6777 | Brunker<br><i>et al</i><br>,2015 |
| RV30<br>92 | 16/12/11 | 680<br>305 | 9798<br>935 | Dom<br>estic<br>dog | MiSeq         | 1045220  | 2104   | 0.20 | 18.69   | KY21<br>0278 | This paper                       |
| RV30<br>93 | 22/12/11 | 681<br>720 | 9798<br>404 | Dom<br>estic<br>dog | MiSeq         | 495576   | 4371   | 0.88 | 42.70   | KR90<br>6778 | Brunker<br><i>et al</i><br>,2015 |
| RV30<br>94 | 21/12/11 | 699<br>127 | 9791<br>922 | Dom<br>estic<br>dog | MiSeq         | 1100604  | 3942   | 0.36 | 35.79   | KY21<br>0279 | This paper                       |
| RV30<br>96 | 30/01/12 | 658<br>200 | 9804<br>251 | Dom<br>estic<br>dog | MiSeq         | 758254   | 2900   | 0.38 | 24.44   | KY21<br>0280 | This paper                       |
| RV30<br>97 | 19/01/12 | 658<br>323 | 9804<br>533 | Dom<br>estic<br>dog | MiSeq         | 384498   | 12069  | 3.14 | 113.75  | KY21<br>0281 | This paper                       |
| RV30<br>98 | 26/01/12 | 658<br>761 | 9804<br>127 | Dom<br>estic<br>dog | MiSeq         | 277003   | 7448   | 2.69 | 73.18   | KY21<br>0282 | This paper                       |
| RV30<br>99 | 19/01/12 | 696<br>747 | 9790<br>182 | Cow                 | MiSeq         | 1440888  | 30135  | 2.09 | 233.29  | KY21<br>0283 | This paper                       |

# MOLECULAR ECOLOGY

|        |          |        |         |              |               |          |       |      |        |          |                             |
|--------|----------|--------|---------|--------------|---------------|----------|-------|------|--------|----------|-----------------------------|
| RV3100 | 19/02/12 | 698140 | 9804256 | Domestic dog | MiSeq         | 668576   | 2648  | 0.40 | 24.11  | KR906779 | Brunker <i>et al</i> , 2015 |
| RV3101 | 06/03/12 | 695255 | 9803449 | Jackal       | MiSeq         | 416501   | 10348 | 2.48 | 86.78  | KY210284 | Brunker <i>et al</i> , 2015 |
| RV3102 | 08/03/12 | 700597 | 9803335 | Goat         | MiSeq         | 291477   | 13309 | 4.57 | 123.32 | KY210285 | Brunker <i>et al</i> , 2015 |
| RV3103 | 10/12/11 | 653049 | 9821771 | Domestic dog | MiSeq/NextSeq | 17549986 | 11210 | 0.06 | 109.93 | KY210286 | Brunker <i>et al</i> , 2015 |
| RV3104 | 22/12/11 | 648913 | 9823033 | sheep        | MiSeq         | 1145840  | 11000 | 0.96 | 95.11  | KR906780 | Brunker <i>et al</i> , 2015 |
| RV3105 | 22/03/12 | 661920 | 9803801 | Domestic dog | MiSeq         | 1009153  | 1365  | 0.14 | 13.11  | KY210287 | This paper                  |
| RV3107 | 09/04/12 | 656704 | 9803322 | Domestic dog | MiSeq         | 959083   | 31920 | 3.33 | 292.64 | KR906781 | Brunker <i>et al</i> , 2015 |
| RV3109 | 12/04/12 | 656691 | 9803564 | Domestic dog | MiSeq         | 409667   | 24684 | 6.03 | 259.04 | KY210288 | This paper                  |
| RV3110 | 30/04/12 | 686063 | 9798923 | Domestic dog | MiSeq         | 346269   | 6180  | 1.78 | 65.54  | KY210289 | This paper                  |
| RV3111 | 29/04/12 | 650984 | 9807685 | Domestic dog | MiSeq         | 897329   | 2674  | 0.30 | 26.85  | KR906782 |                             |
| RV31   | 06/05/12 | 685    | 9792    | Dom          | MiSeq/NextSeq | 18115513 | 68797 | 0.38 | 761.18 | KY21     | This paper                  |

# MOLECULAR ECOLOGY

|            |          |            |             |                     |               |          |       |      |        |              |                                  |
|------------|----------|------------|-------------|---------------------|---------------|----------|-------|------|--------|--------------|----------------------------------|
| 13         |          | 149        | 574         | estic<br>dog        |               |          |       |      |        | 0290         |                                  |
| RV31<br>14 | 06/05/12 | 685<br>205 | 9792<br>549 | Jacka<br>l          | MiSeq         | 854689   | 16344 | 1.91 | 159.71 | KY21<br>0291 | This paper                       |
| RV31<br>15 | 11/05/12 | 680<br>871 | 9782<br>055 | Dom<br>estic<br>dog | MiSeq         | 800250   | 3034  | 0.38 | 29.22  | KY21<br>0292 | This paper                       |
| RV31<br>17 | 12/05/12 | 669<br>765 | 9795<br>977 | Dom<br>estic<br>dog | MiSeq         | 2331749  | 6102  | 0.26 | 57.60  | KR90<br>6783 | Brunker<br><i>et al</i><br>,2015 |
| RV31<br>19 | 17/05/12 | 680<br>871 | 9782<br>055 | Dom<br>estic<br>dog | MiSeq/NextSeq | 15519701 | 7634  | 0.05 | 81.87  | KY21<br>0293 | This paper                       |
| RV31<br>21 | 28/05/12 | 655<br>915 | 9809<br>872 | Dom<br>estic<br>dog | MiSeq         | 1321266  | 14930 | 1.13 | 132.03 | KY21<br>0294 | This paper                       |
| RV31<br>22 | 14/05/12 | 662<br>827 | 9818<br>718 | Dom<br>estic<br>dog | MiSeq         | 1328914  | 5972  | 0.45 | 56.12  | KY21<br>0295 | This paper                       |
| RV31<br>23 | 26/04/12 | 647<br>442 | 9799<br>177 | Dom<br>estic<br>dog | MiSeq         | 1530487  | 7221  | 0.47 | 65.08  | KR90<br>6792 | Brunker<br><i>et al</i><br>,2015 |
| RV31<br>24 | 07/05/12 | 657<br>028 | 9804<br>565 | Dom<br>estic<br>dog | MiSeq         | 903958   | 9073  | 1.00 | 86.74  | KY21<br>0296 | This paper                       |
| RV31<br>25 | 06/06/12 | 658<br>003 | 9809<br>433 | Goat                | MiSeq/NextSeq | 16181484 | 10504 | 0.06 | 105.89 | KR90<br>6784 | Brunker<br><i>et al</i><br>,2015 |
| RV31<br>27 | 11/06/12 | 681<br>576 | 9797<br>817 | Dom<br>estic<br>dog | MiSeq         | 461052   | 20729 | 4.50 | 204.27 | KR90<br>6785 | Brunker<br><i>et al</i><br>,2015 |

# MOLECULAR ECOLOGY

|            |          |            |             |                     |               |          |       |      |        |              |                                  |
|------------|----------|------------|-------------|---------------------|---------------|----------|-------|------|--------|--------------|----------------------------------|
| RV31<br>28 | 16/06/12 | 674<br>458 | 9797<br>076 | Donk<br>ey          | MiSeq         | 2044844  | 9514  | 0.47 | 88.78  | KR90<br>6786 | Brunker<br><i>et al</i><br>,2015 |
| RV31<br>29 | 25/06/12 | 662<br>827 | 9819<br>718 | Shee<br>p           | MiSeq         | 871812   | 41446 | 4.75 | 408.32 | KY21<br>0297 | This paper                       |
| RV31<br>30 | 28/06/12 | 662<br>827 | 9818<br>718 | Goat                | MiSeq         | 155506   | 10100 | 6.49 | 103.35 | KY21<br>0298 | This paper                       |
| RV31<br>31 | 07/07/12 | 685<br>498 | 9797<br>037 | Dom<br>estic<br>dog | MiSeq         | 1518274  | 12181 | 0.80 | 113.24 | KR90<br>6787 | Brunker<br><i>et al</i><br>,2015 |
| RV31<br>32 | 02/04/12 | 656<br>028 | 9801<br>566 | Dom<br>estic<br>dog | MiSeq         | 489623   | 1478  | 0.30 | 13.93  | KR90<br>6788 | Brunker<br><i>et al</i><br>,2015 |
| RV31<br>33 | 04/07/12 | 700<br>856 | 9800<br>221 | Dom<br>estic<br>dog | MiSeq/NextSeq | 14589139 | 11715 | 0.08 | 118.01 | KR90<br>6789 | Brunker<br><i>et al</i><br>,2015 |
| RV31<br>34 | 19/07/12 | 689<br>067 | 9791<br>597 | Dom<br>estic<br>dog | MiSeq         | 1280905  | 3509  | 0.27 | 34.25  | KY21<br>0299 | This paper                       |
| RV31<br>35 | 19/07/12 | 695<br>591 | 9788<br>282 | Dom<br>estic<br>dog | MiSeq         | 1327972  | 10241 | 0.77 | 95.70  | KY21<br>0300 | This paper                       |
| RV31<br>36 | 16/07/12 | 678<br>119 | 9799<br>572 | Cow                 | MiSeq         | 993550   | 15864 | 1.60 | 153.90 | KY21<br>0301 | This paper                       |
| RV31<br>37 | 21/07/12 | 682<br>623 | 9783<br>025 | Goat                | MiSeq         | 673235   | 14221 | 2.11 | 140.50 | KY21<br>0302 | This paper                       |
| RV31<br>38 | 16/07/12 | 677<br>206 | 9805<br>047 | Dom<br>estic<br>dog | MiSeq         | 1634873  | 13081 | 0.80 | 126.10 | KY21<br>0303 | This paper                       |
| RV31<br>39 | 07/07/12 | 685<br>498 | 9797<br>937 | Dom<br>estic        | MiSeq         | 1500822  | 7764  | 0.52 | 74.40  | KY21<br>0304 | This paper                       |

# MOLECULAR ECOLOGY

|            |          |            |             |                     |               |          |        |      |         |              |                                  |
|------------|----------|------------|-------------|---------------------|---------------|----------|--------|------|---------|--------------|----------------------------------|
|            |          |            |             | dog                 |               |          |        |      |         |              |                                  |
| RV31<br>40 | 27/07/12 | 656<br>945 | 9804<br>374 | Dom<br>estic<br>dog | MiSeq         | 1907863  | 99500  | 5.22 | 737.59  | KR90<br>6790 | Brunker<br><i>et al</i><br>,2015 |
| RV31<br>45 | 08/08/12 | 658<br>701 | 9825<br>071 | Hyen<br>a           | MiSeq/NextSeq | 15216797 | 10232  | 0.07 | 110.25  | KY21<br>0305 | This paper                       |
| RV31<br>46 | 26/05/12 | 697<br>865 | 9803<br>637 | Civet               | MiSeq/NextSeq | 16819682 | 13702  | 0.08 | 135.45  | KY21<br>0306 | This paper                       |
| RV31<br>49 | 23/01/12 | 657<br>742 | 9809<br>576 | Dom<br>estic<br>dog | MiSeq         | 365335   | 802    | 0.22 | 6.23    | KR90<br>6791 | This paper                       |
| RV31<br>50 | 24/03/12 | 682<br>197 | 9791<br>269 | Dom<br>estic<br>dog | MiSeq         | 1194163  | 43373  | 3.63 | 407.75  | KY21<br>0307 | This paper                       |
| RV31<br>51 | 07/01/12 | 648<br>913 | 9823<br>033 | Cow                 | MiSeq         | 105666   | 6227   | 5.89 | 60.67   | KY21<br>0308 | This paper                       |
| RV31<br>52 | 31/05/12 | 695<br>002 | 9803<br>207 | NA                  | MiSeq/NextSeq | 14910632 | 4003   | 0.03 | 42.77   | KY21<br>0309 | This paper                       |
| RV31<br>53 | 23/01/12 | 694<br>625 | 9806<br>377 | Goat                | NextSeq       | 12054558 | 62937  | 0.52 | 637.73  | KY21<br>0310 | This paper                       |
| RV31<br>54 | 29/04/12 | 658<br>670 | 9802<br>617 | Dom<br>estic<br>dog | NextSeq       | 14618752 | 401835 | 2.75 | 3228.77 | KY21<br>0311 | This paper                       |

**S1 Fig.** Pearson's correlation between human and dog population density in the Serengeti District based on a complete census conducted in the district.

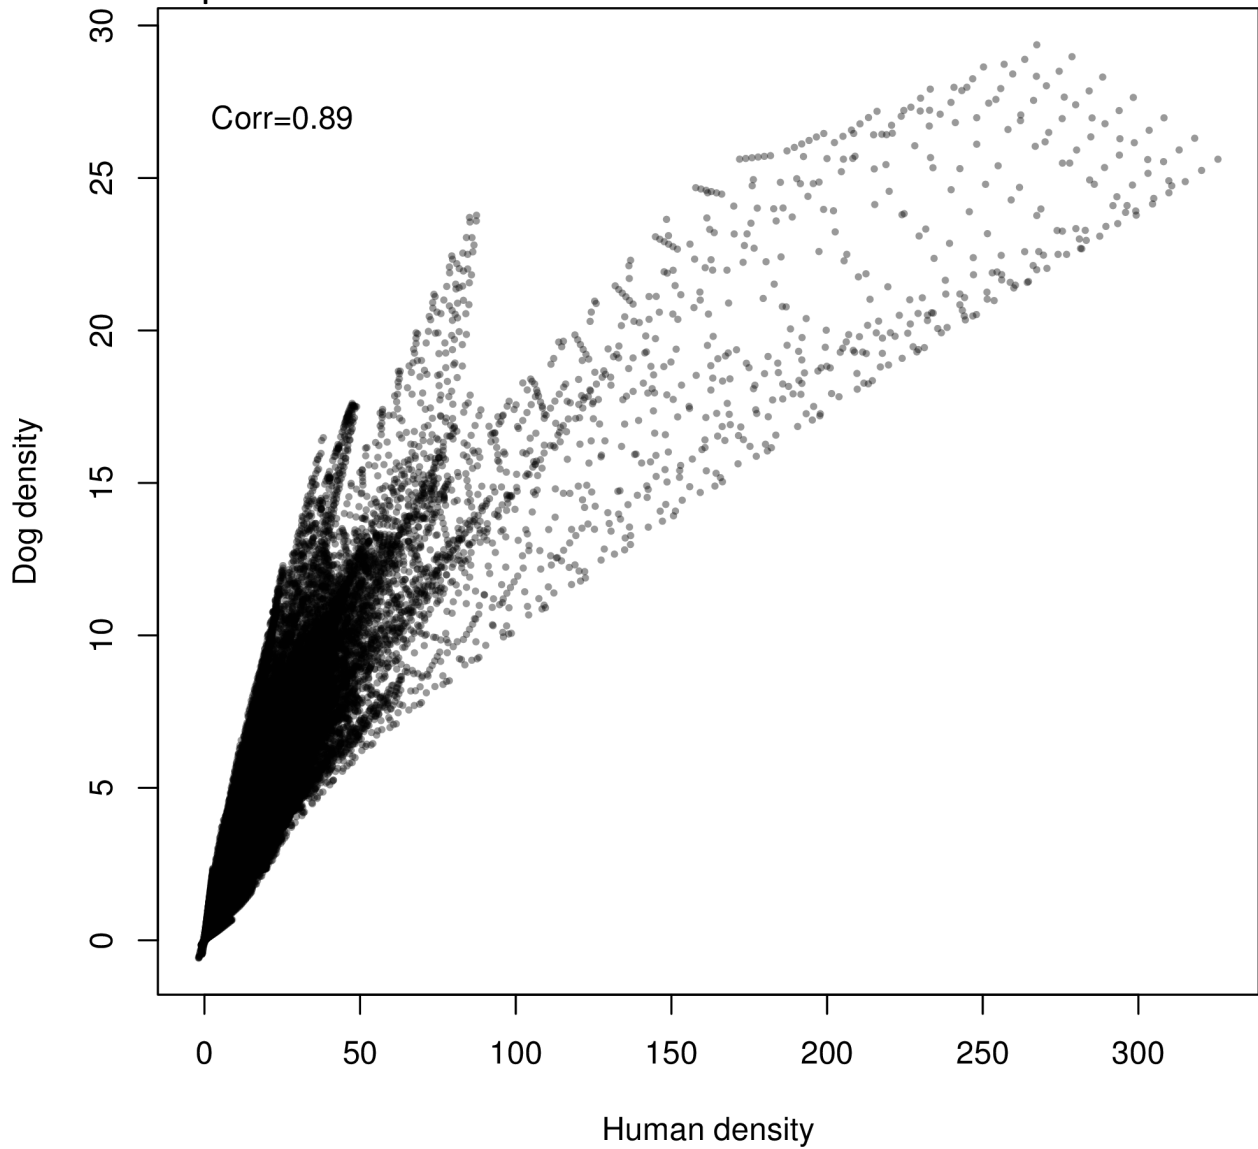

**S2 Fig. Maximum likelihood phylogeny of 152 rabies cases collected from the Serengeti District, Tanzania 2004-2013.** The phylogeny is scaled in substitutions per site and two major lineages are coloured, Tz1 (yellow triangles) and Tz3 (purple circles). Grey circles indicate bootstrap support  $\geq 80\%$ .

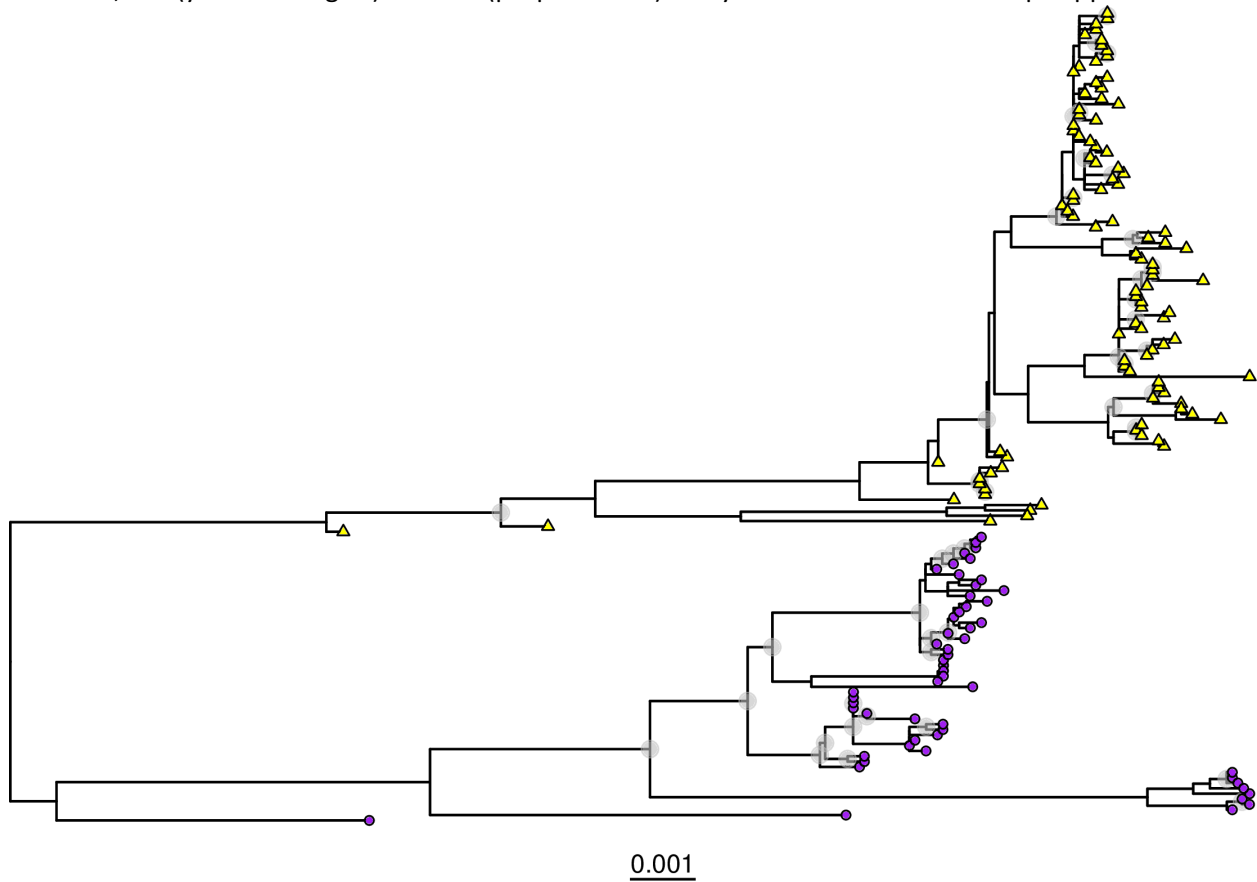

**S3 Fig. Spatial clusters of 152 rabies cases in the Serengeti District according to k-means partitioning using a Euclidean distance matrix.** (A-K) Each cluster is designated by a unique colour/symbol combination for a number of clusters ( $k$ ) ranging from  $k=5$  to  $k=15$ . Map created using R packages ggmap (Kahle & Wickham, 2013) and maptools (Lewin-Koh et al., 2012) with administrative boundaries from [www.nbs.go.tz](http://www.nbs.go.tz).

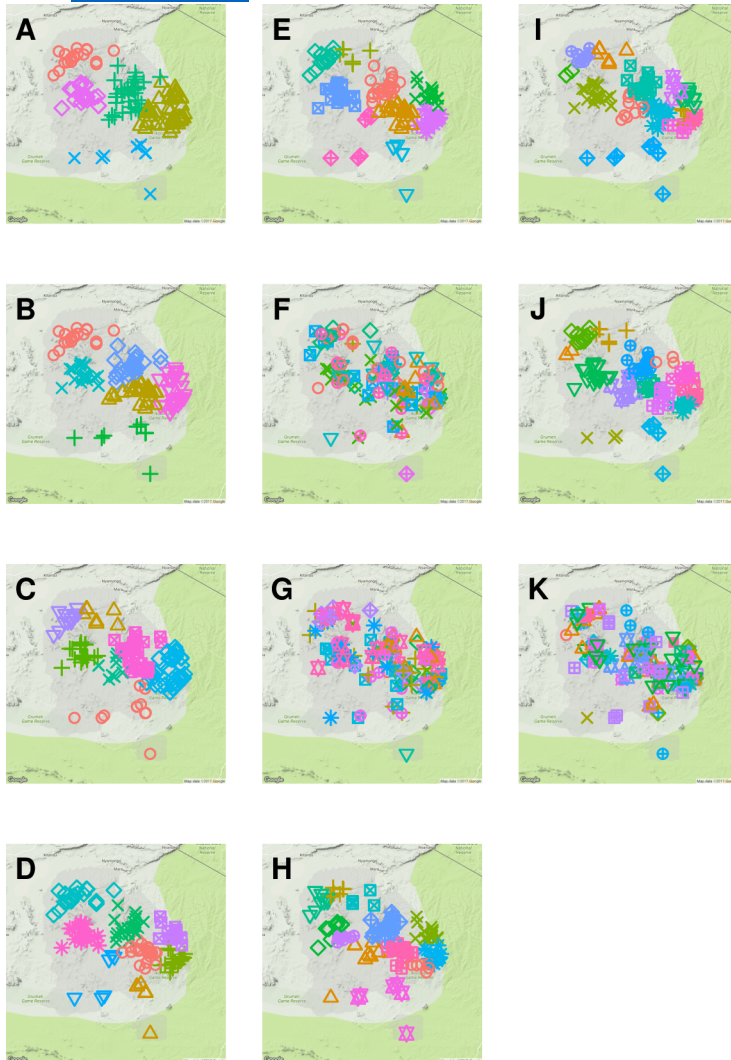



**S4 Fig. Centroids of spatial clusters assigned according to k-means partitioning using a Euclidean distance matrix for 152 rabies cases in the Serengeti District. (A-K) Centroid positions for a number of clusters ( $k$ ) ranging from  $k=5$  to  $k=15$ . Map created using R package maptools and administrative boundaries from [www.nbs.go.tz](http://www.nbs.go.tz).**

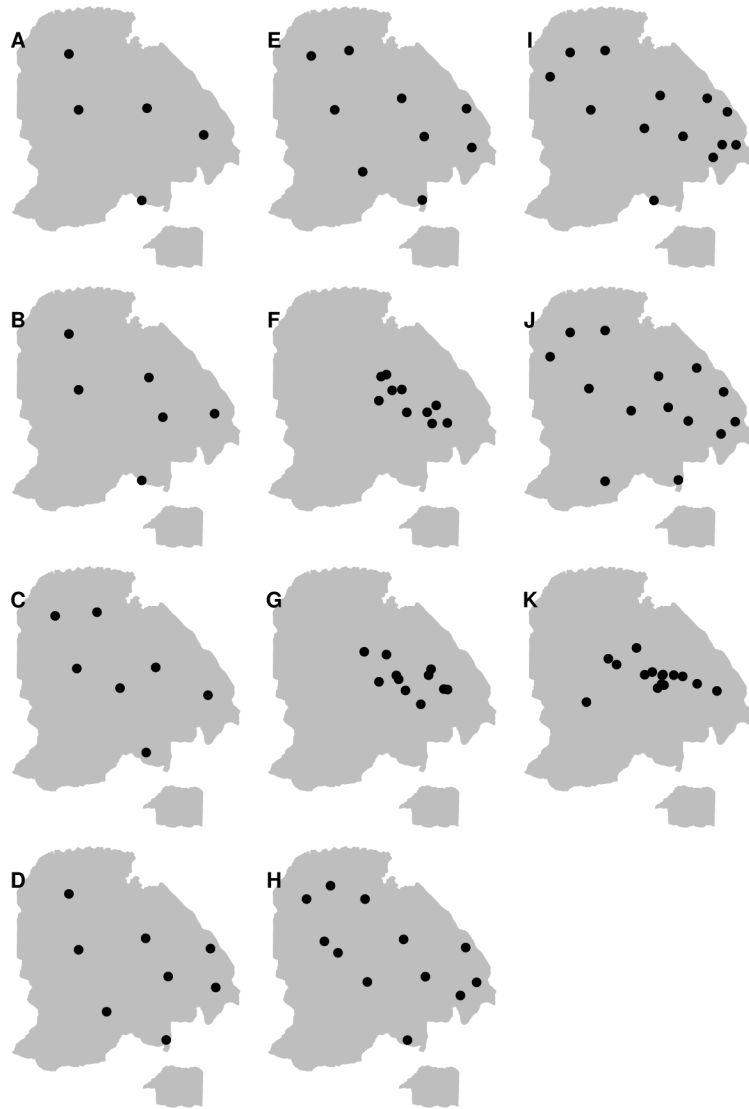

Supplement: MEC-27-773-s001.pdf [file MEC-27-773-s001.pdf]
